# Supplementary material for: Changes in phytoplankton production and upwelling intensity off A Coruña (NW Spain) for the last 28 years
Source: Springer Nature journal article supplement (doi:10.1007/s10236-019-01278-y), 2019-06-10
Supplement: 10236_2019_1278_MOESM1_ESM.pdf [file 10236_2019_1278_MOESM1_ESM.pdf]

**Changes in phytoplankton production and upwelling intensity off A Coruña (NW Spain) for the last 28 yr**

Antonio Bode\*, Marta Álvarez, Manuel Ruíz-Villarreal and Marta M. Varela  
 Instituto Español de Oceanografía, Centro Oceanográfico de A Coruña, Apdo. 130, 15080 A Coruña, Spain

\*corresponding author e-mail: [antonio.bode@ieo.es](mailto:antonio.bode@ieo.es)

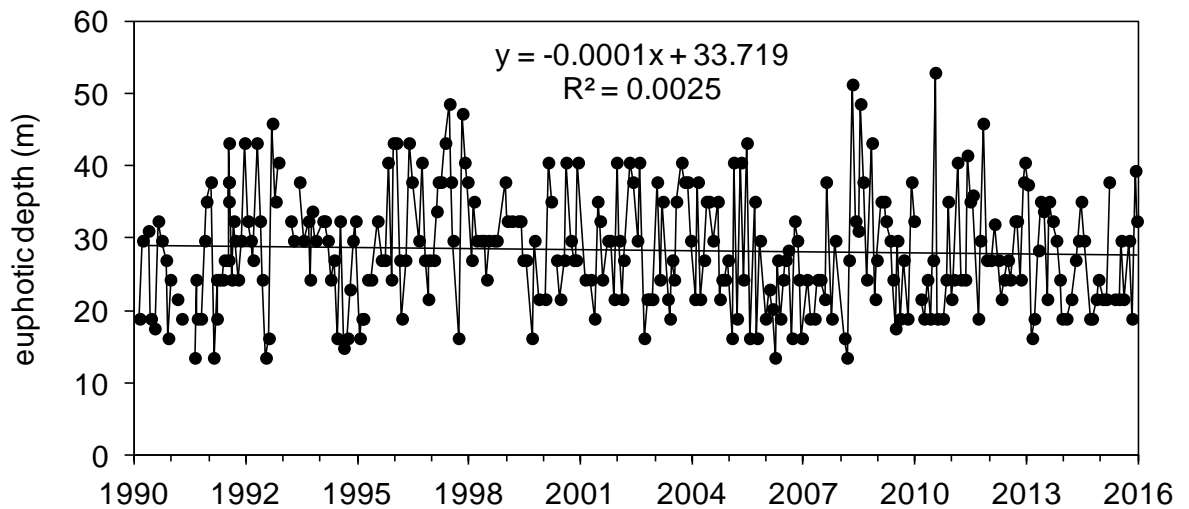

Time series of euphotic depth (1% of surface PAR) determined at station E2CO from CTD PAR profiles. The line and equation indicate that temporal trend is not significant (linear regression,  $p > 0.05$ ). R2: determination coefficient.
