# Supplementary material for: Changes in phytoplankton production and upwelling intensity off A Coruña (NW Spain) for the last 28 years
Source: Springer Nature journal article supplement (doi:10.1007/s10236-019-01278-y), 2019-06-10
Supplement: 10236_2019_1278_MOESM2_ESM.pdf [file 10236_2019_1278_MOESM2_ESM.pdf]

## Ocean Dynamics

### Changes in phytoplankton production and upwelling intensity off A Coruña (NW Spain) for the last 28 yr

Antonio Bode\*, Marta Álvarez, Manuel Ruíz-Villarreal and Marta M. Varela

Instituto Español de Oceanografía, Centro Oceanográfico de A Coruña, Apdo. 130, 15080 A Coruña, Spain

\*corresponding author e-mail: [antonio.bode@ieo.es](mailto:antonio.bode@ieo.es)

Spearman correlations (lower semimatrix) and significance (upper semimatrix) of selected variables measured at station E2CO. SST and SSS: sea surface temperature and salinity, NO<sub>3</sub>, PO<sub>4</sub> and SiO<sub>4</sub>: photic-zone integrated total nitrate, phosphate, and silicate, O<sub>2</sub>: mean oxygen concentration in the photic zone, NO<sub>3<sub>b</sub></sub>, PO<sub>4<sub>b</sub></sub> and SiO<sub>4<sub>b</sub></sub>: total nitrate (nitrate+nitrite), phosphate and silicate in bottom water (70 m), Chl, PP, POC and PON: photic-zone integrated chlorophyll, primary production and particulate carbon and nitrogen, UI: upwelling index averaged for 15 d prior to sampling. Significant values ( $p<0.05$ ) appear in bold.

|                              | SST           | SSS           | NO <sub>3</sub> | PO <sub>4</sub> | SiO <sub>4</sub> | NO <sub>3<sub>b</sub></sub> | PO <sub>4<sub>b</sub></sub> | SiO <sub>4<sub>b</sub></sub> | O <sub>2</sub> | Chl          | PP           | POC          | NOP          | UI    |
|------------------------------|---------------|---------------|-----------------|-----------------|------------------|-----------------------------|-----------------------------|------------------------------|----------------|--------------|--------------|--------------|--------------|-------|
| SST                          | 1.000         | 0.287         | 0.000           | 0.000           | 0.001            | 0.000                       | 0.102                       | 0.000                        | 0.000          | 0.023        | 0.000        | 0.000        | 0.000        | 0.386 |
| SSS                          | 0.062         | 1.000         | 0.248           | 0.384           | 0.000            | 0.152                       | 0.305                       | 0.611                        | 0.588          | 0.211        | 0.687        | 0.803        | 0.205        | 0.000 |
| NO <sub>3</sub>              | <b>-0.415</b> | -0.068        | 1.000           | 0.000           | 0.000            | 0.000                       | 0.000                       | 0.000                        | 0.000          | 0.088        | 0.068        | 0.000        | 0.000        | 0.954 |
| PO <sub>4</sub>              | <b>-0.269</b> | -0.052        | <b>0.614</b>    | 1.000           | 0.000            | 0.000                       | 0.000                       | 0.000                        | 0.001          | 0.741        | 0.893        | 0.003        | 0.001        | 0.030 |
| SiO <sub>4</sub>             | <b>-0.197</b> | <b>-0.247</b> | <b>0.558</b>    | <b>0.546</b>    | 1.000            | 0.236                       | 0.000                       | 0.000                        | 0.000          | 0.052        | 0.148        | 0.000        | 0.000        | 0.000 |
| NO <sub>3<sub>b</sub></sub>  | <b>0.272</b>  | 0.085         | <b>0.354</b>    | <b>0.385</b>    | 0.070            | 1.000                       | 0.000                       | 0.000                        | 0.006          | 0.000        | 0.000        | 0.000        | 0.000        | 0.000 |
| PO <sub>4<sub>b</sub></sub>  | 0.096         | 0.061         | <b>0.272</b>    | <b>0.735</b>    | <b>0.210</b>     | <b>0.725</b>                | 1.000                       | 0.000                        | 0.083          | 0.001        | 0.000        | 0.089        | 0.095        | 0.000 |
| SiO <sub>4<sub>b</sub></sub> | <b>0.270</b>  | -0.030        | <b>0.217</b>    | <b>0.404</b>    | <b>0.526</b>     | <b>0.600</b>                | <b>0.572</b>                | 1.000                        | 0.000          | 0.000        | 0.000        | 0.033        | 0.008        | 0.000 |
| O <sub>2</sub>               | <b>-0.369</b> | -0.033        | <b>-0.296</b>   | <b>-0.199</b>   | <b>-0.378</b>    | <b>-0.169</b>               | -0.107                      | <b>-0.272</b>                | 1.000          | 0.006        | 0.041        | 0.000        | 0.000        | 0.017 |
| Chl                          | <b>0.131</b>  | 0.073         | -0.096          | -0.019          | -0.114           | <b>0.339</b>                | <b>0.182</b>                | <b>0.264</b>                 | <b>0.167</b>   | 1.000        | 0.000        | 0.000        | 0.000        | 0.000 |
| PP                           | <b>0.239</b>  | 0.024         | -0.106          | 0.008           | -0.086           | <b>0.420</b>                | <b>0.265</b>                | <b>0.351</b>                 | <b>0.125</b>   | <b>0.701</b> | 1.000        | 0.000        | 0.000        | 0.000 |
| POC                          | <b>0.354</b>  | 0.016         | <b>-0.259</b>   | <b>-0.182</b>   | <b>-0.316</b>    | <b>0.300</b>                | 0.106                       | <b>0.133</b>                 | <b>0.259</b>   | <b>0.574</b> | <b>0.563</b> | 1.000        | 0.000        | 0.000 |
| PON                          | <b>0.398</b>  | 0.079         | <b>-0.323</b>   | <b>-0.214</b>   | <b>-0.337</b>    | <b>0.306</b>                | 0.105                       | <b>0.165</b>                 | <b>0.242</b>   | <b>0.664</b> | <b>0.610</b> | <b>0.932</b> | 1.000        | 0.000 |
| UI                           | 0.050         | <b>0.277</b>  | 0.003           | <b>0.122</b>    | <b>-0.231</b>    | <b>0.489</b>                | <b>0.393</b>                | <b>0.233</b>                 | <b>0.146</b>   | <b>0.442</b> | <b>0.465</b> | <b>0.361</b> | <b>0.418</b> | 1.000 |
