# Supplementary material for: Changes in phytoplankton production and upwelling intensity off A Coruña (NW Spain) for the last 28 years
Source: Springer Nature journal article supplement (doi:10.1007/s10236-019-01278-y), 2019-06-10
Supplement: 10236_2019_1278_MOESM3_ESM.pdf [file 10236_2019_1278_MOESM3_ESM.pdf]

**Changes in phytoplankton production and upwelling intensity off A Coruña (NW Spain) for the last 28 yr**

Antonio Bode\*, Marta Álvarez, Manuel Ruíz-Villarreal and Marta M. Varela  
 Instituto Español de Oceanografía, Centro Oceanográfico de A Coruña, Apdo. 130, 15080 A Coruña, Spain

\*corresponding author e-mail: [antonio.bode@ieo.es](mailto:antonio.bode@ieo.es)

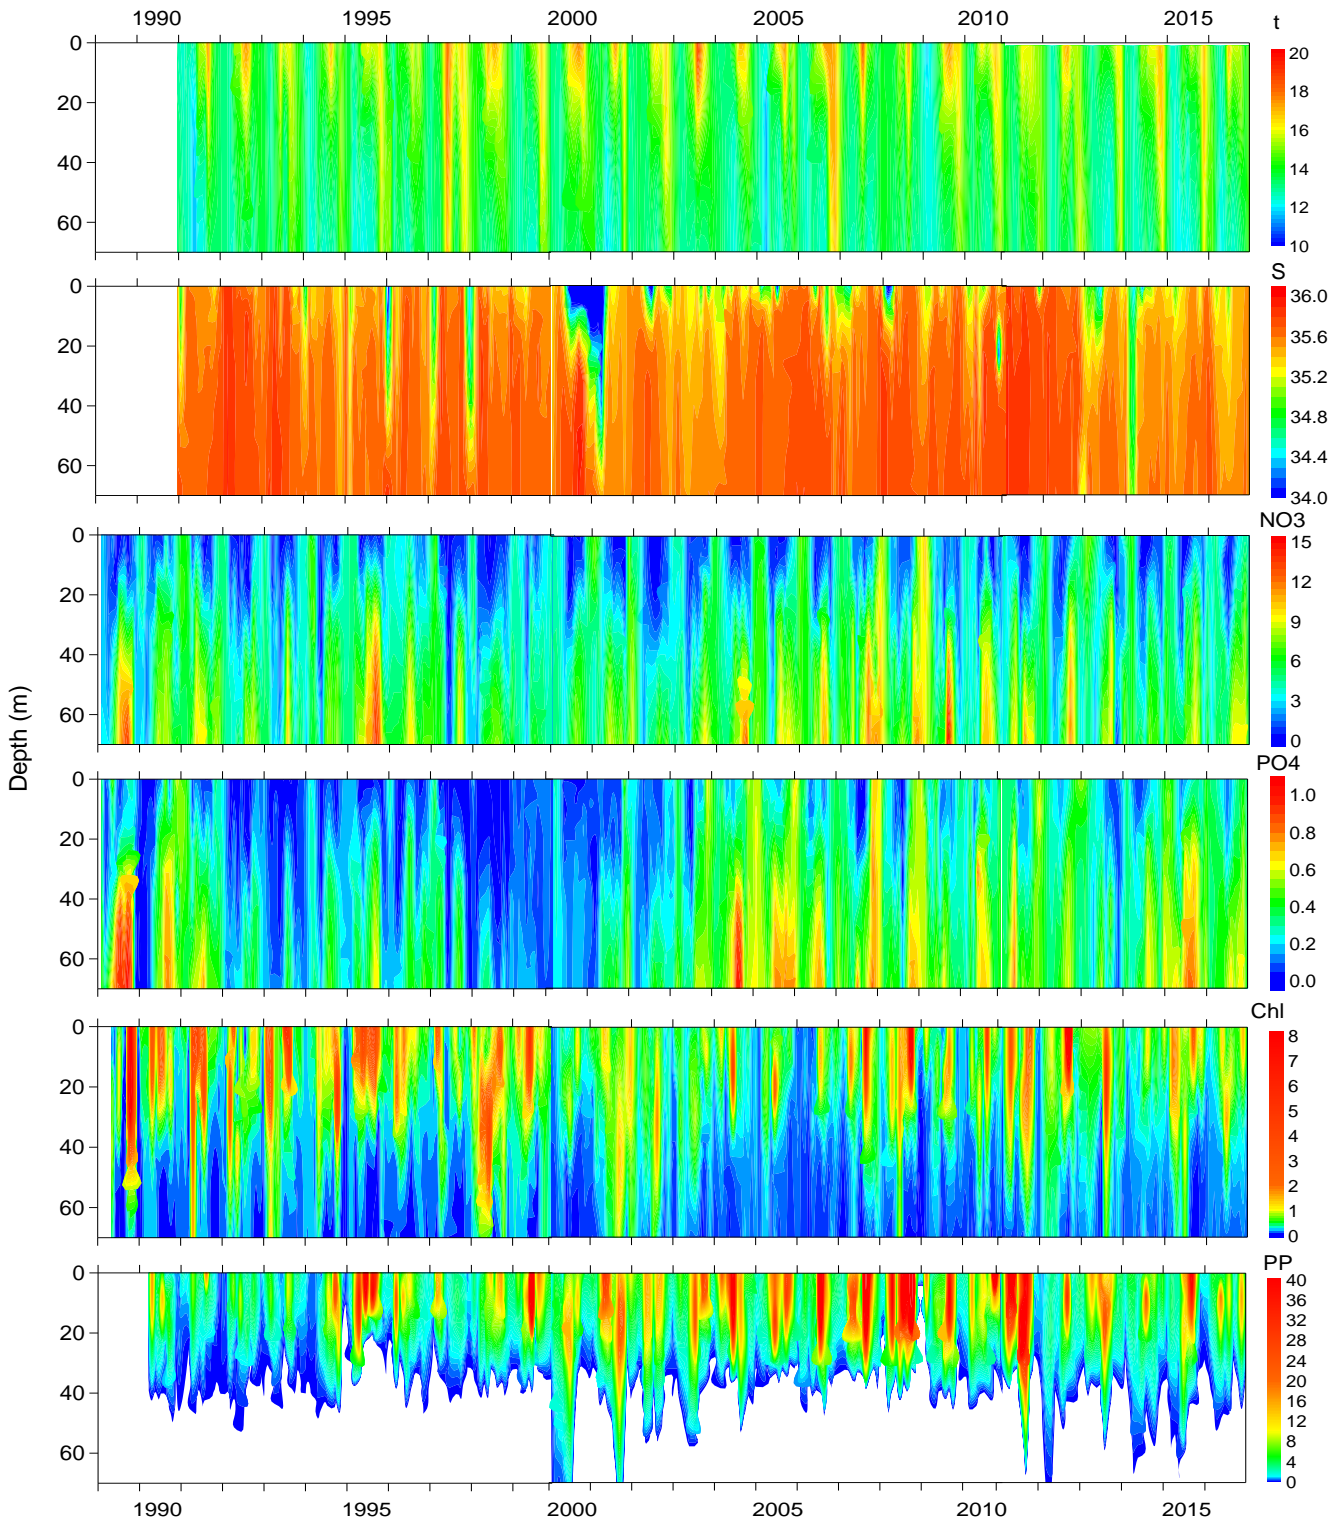

Distribution of temperature ( $t$ , °C), salinity ( $S$ ), nitrate+nitrite ( $NO_3$ ,  $\mu M$ ), phosphate ( $PO_4$ ,  $\mu M$ ), silicate ( $SiO_4$ ,  $\mu M$ ), chlorophyll ( $Chl$ ,  $\mu g L^{-1}$ ) and primary production ( $PP$ ,  $mg C m^{-3} h^{-1}$ ) at station E2CO.
