# Supplementary material for: Changes in phytoplankton production and upwelling intensity off A Coruña (NW Spain) for the last 28 years
Source: Springer Nature journal article supplement (doi:10.1007/s10236-019-01278-y), 2019-06-10
Supplement: 10236_2019_1278_MOESM4_ESM.pdf [file 10236_2019_1278_MOESM4_ESM.pdf]

## Ocean Dynamics

### Changes in phytoplankton production and upwelling intensity off A Coruña (NW Spain) for the last 28 yr

Antonio Bode\*, Marta Álvarez, Manuel Ruíz-Villarreal and Marta M. Varela

Instituto Español de Oceanografía, Centro Oceanográfico de A Coruña, Apdo. 130, 15080 A Coruña, Spain

\*corresponding author e-mail: [antonio.bode@ieo.es](mailto:antonio.bode@ieo.es)

Mean ( $\pm$ se) photic-zone integrated chlorophyll (Chl, mg m<sup>-2</sup>) and primary production (mg C m<sup>-2</sup> h<sup>-1</sup>) by semesters in the different phases identified in Fig. 1. The letters indicate significantly different means (PERMANOVA and Bonferroni tests,  $p < 0.05$ ). n: number of data

| semester      | period    | Chl                | PP                   | n  |
|---------------|-----------|--------------------|----------------------|----|
| January-June  | 1989-1997 | 33.22 $\pm$ 4.96 a | 106.76 $\pm$ 16.82 a | 49 |
|               | 1998-2006 | 40.32 $\pm$ 3.84 a | 219.91 $\pm$ 30.14 a | 51 |
|               | 2006-2016 | 62.55 $\pm$ 7.31 b | 396.81 $\pm$ 68.44 b | 58 |
| July-December | 1989-1997 | 42.25 $\pm$ 4.38 a | 124.92 $\pm$ 20.13 a | 53 |
|               | 1998-2006 | 44.29 $\pm$ 4.76 a | 306.50 $\pm$ 44.07 a | 49 |
|               | 2006-2016 | 40.71 $\pm$ 5.15 a | 212.49 $\pm$ 42.78 b | 57 |
