# Supplementary material for: Changes in phytoplankton production and upwelling intensity off A Coruña (NW Spain) for the last 28 years
Source: Springer Nature journal article supplement (doi:10.1007/s10236-019-01278-y), 2019-06-10
Supplement: 10236_2019_1278_MOESM5_ESM.pdf [file 10236_2019_1278_MOESM5_ESM.pdf]

## Ocean Dynamics

### Changes in phytoplankton production and upwelling intensity off A Coruña (NW Spain) for the last 28 yr

Antonio Bode\*, Marta Álvarez, Manuel Ruíz-Villarreal and Marta M. Varela

Instituto Español de Oceanografía, Centro Oceanográfico de A Coruña, Apdo. 130, 15080 A Coruña, Spain

\*corresponding author e-mail: [antonio.bode@ieo.es](mailto:antonio.bode@ieo.es)

Factor loadings for the PCA on selected environmental variables in the first three principal components (PC1, PC2 and PC3, respectively). Variable names as in Fig. 5 and Online Resource 2.

|      | PC 1   | PC 2   | PC 3   |
|------|--------|--------|--------|
| SST  | -0.339 | -0.217 | 0.329  |
| SSS  | 0.302  | 0.040  | -0.547 |
| NO3  | 0.463  | 0.059  | 0.373  |
| PO4  | 0.514  | 0.026  | 0.279  |
| SiO4 | 0.151  | -0.514 | 0.412  |
| O2   | -0.103 | 0.657  | 0.122  |
| POC  | -0.359 | 0.344  | 0.410  |
| UI   | 0.392  | 0.364  | 0.150  |
