# Supplementary material for: Changes in phytoplankton production and upwelling intensity off A Coruña (NW Spain) for the last 28 years
Source: Springer Nature journal article supplement (doi:10.1007/s10236-019-01278-y), 2019-06-10
Supplement: 10236_2019_1278_MOESM6_ESM.pdf [file 10236_2019_1278_MOESM6_ESM.pdf]

## Changes in phytoplankton production and upwelling intensity off A Coruña (NW Spain) for the last 28 yr

Antonio Bode\*, Marta Álvarez, Manuel Ruíz-Villarreal and Marta M. Varela  
 Instituto Español de Oceanografía, Centro Oceanográfico de A Coruña, Apdo. 130, 15080 A Coruña, Spain

\*corresponding author e-mail: [antonio.bode@ieo.es](mailto:antonio.bode@ieo.es)

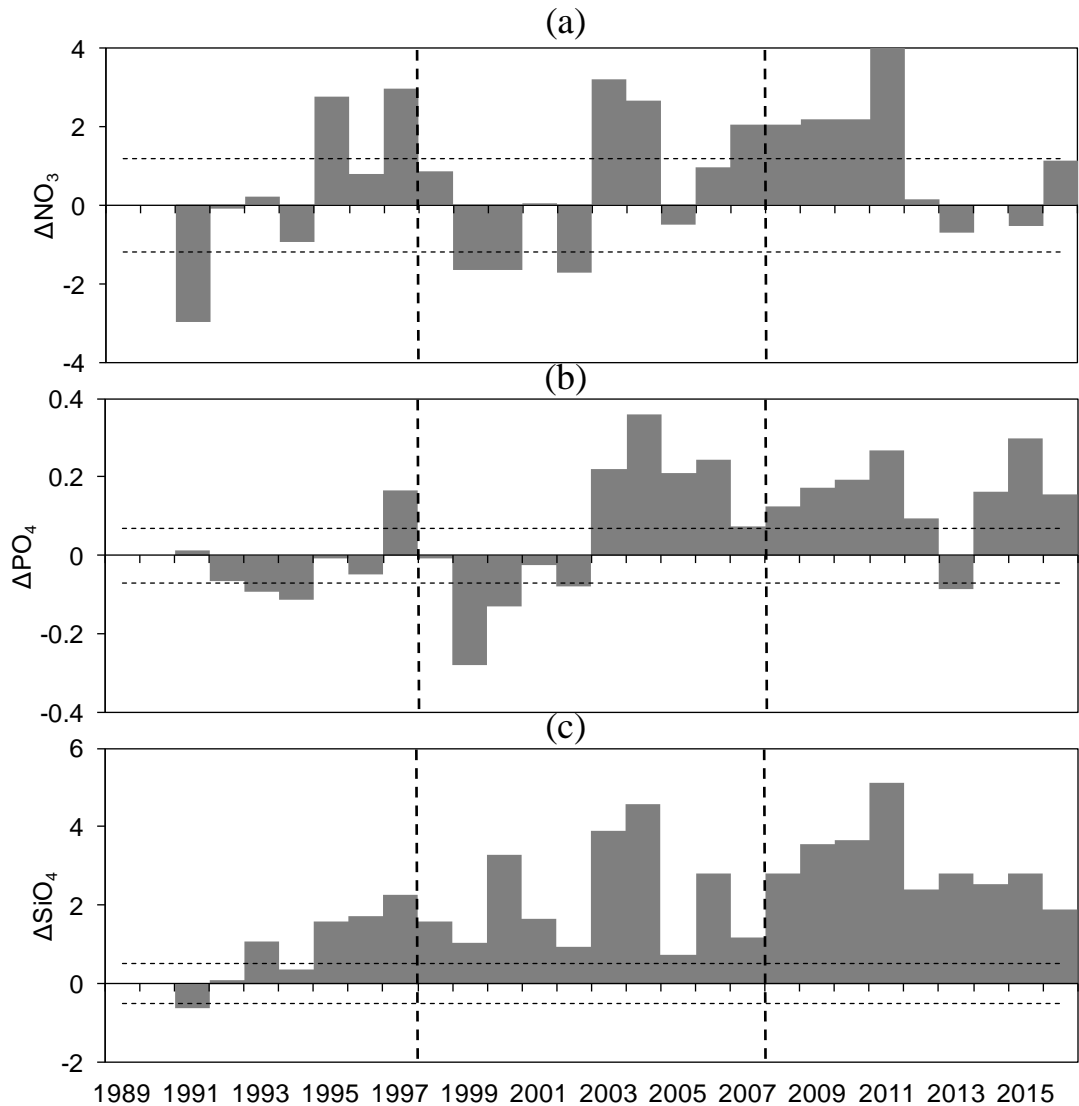

Time series of annual anomalies in bottom water (70m) concentrations ( $\mu\text{M}$ ) of (a) nitrate ( $\Delta\text{NO}_3$ ), (b) phosphate ( $\Delta\text{PO}_4$ ) or (c) silicate ( $\Delta\text{SiO}_4$ ) from those expected from Eastern North Atlantic Central Waters (ENACW) during upwelling events (March to October). The horizontal dashed lines indicate  $\pm 1$  standard error of the estimation. The vertical dashed lines indicate the phases identified in Fig. 1. Expected ENACW nutrients computed from equations in Alvarez-Salgado et al. (2002).
